# Supplementary material for: Association between Risk Communication Format and Perceived Risk of Adverse Events after COVID-19 Vaccination among US Adults
Source: MDPI journal article supplement (doi:10.3390/healthcare11030380), 2023-01-29
Supplement: s1 [file s1]

**Supplementary Material****Table S1: American Association for Public Opinion Reporting (AAPOR) reporting guidelines checklist**

| Checklist Item                            | Response                                                                                                                                                                                                                                              |
|-------------------------------------------|-------------------------------------------------------------------------------------------------------------------------------------------------------------------------------------------------------------------------------------------------------|
| Survey Sponsor                            | University of Washington                                                                                                                                                                                                                              |
| Survey/Data Collection Supplier           | Survey created on Qualtrics. Survey administered on Amazon's Mechanical Turk platform via the CloudResearch Inc. interface                                                                                                                            |
| Population represented                    | Adults in the United States                                                                                                                                                                                                                           |
| Sample Size                               | 2395 opened survey<br>284 indicated they were University of Washington employees and were removed<br>319 duplicate IP addresses removed<br>136 removed for completing < 99% of the survey<br>717 fully vaccinated/boosted removed<br>939 final sample |
| Mode of Data Collection                   | Internet survey                                                                                                                                                                                                                                       |
| Type of sample                            | Non-probability                                                                                                                                                                                                                                       |
| Start and end dates of Data Collection    | 1/10/2022 – 1/11/2022                                                                                                                                                                                                                                 |
| Margin of sampling error for total sample | N/A                                                                                                                                                                                                                                                   |
| Are the data weighted?                    | No                                                                                                                                                                                                                                                    |
| Subgroup reporting                        | No                                                                                                                                                                                                                                                    |
